# Supplementary material for: Coordination control of a semicarbazide Schiff base ligand for spontaneous aggregation of a Ni2Ln2 cubane family: influence of ligand arms and carboxylate bridges on the organization of the magnetic core
Source: Royal Society of Chemistry journal article supplement (doi:10.1039/c9nj05686f), 2020-01-01
Supplement: c9nj05686f1.pdf [file c9nj05686f1.pdf]

## Electronic Supplementary Information

### **Coordination Control of a Semicarbazide Schiff Base Ligand for Spontaneous Aggregation of a Ni<sub>2</sub>Ln<sub>2</sub> Cubane Family: Influence of Ligand Arms and Carboxylate Bridges on the Organization of the Magnetic Core**

Mousumi Biswas,<sup>a</sup> E. Carolina Sañudo<sup>b,c</sup>, Jordi Cirera<sup>b,d</sup> and Debashis Ray<sup>\*,a</sup>

<sup>a</sup>Department of Chemistry, Indian Institute of Technology, Kharagpur 721302, India

<sup>b</sup>Departament de Química Inorgànica i Orgànica, Universitat de Barcelona, Diagonal 645, 08028 Barcelona SPAIN

<sup>c</sup>Institut de Nanociència i Nanotecnologia, Universitat de Barcelona, (IN2UB) 08028 Barcelona SPAIN

<sup>d</sup>Institut de Química Teòrica i Computacional, Universitat de Barcelona (IQTC-UB), Martí i Franqués 1-11, 08028, Barcelona, Spain

E-mail: [dray@chem.iitkgp.ac.in](mailto:dray@chem.iitkgp.ac.in)

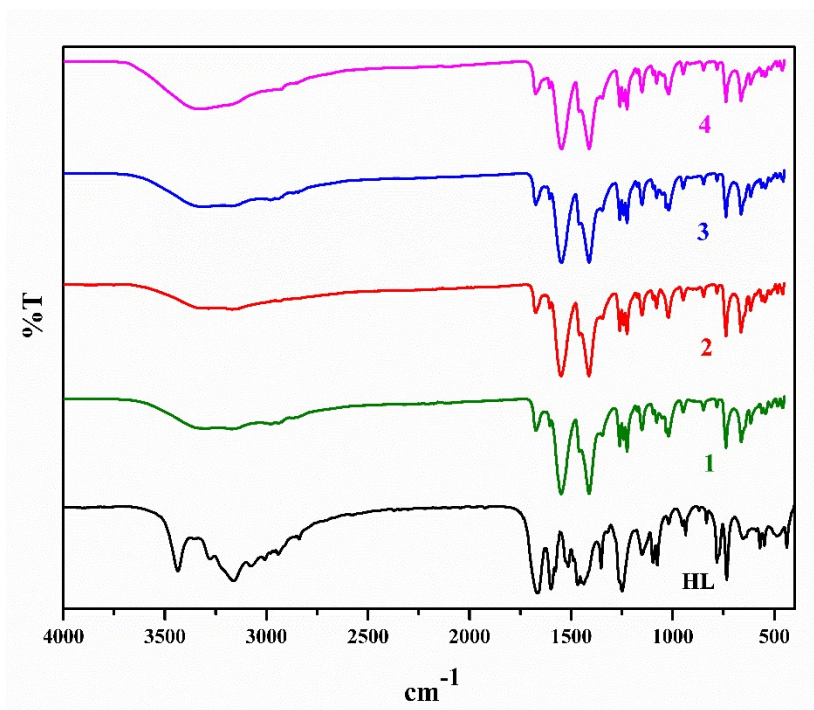

**Figure S1.** FT-IR spectra of complexes 1-4

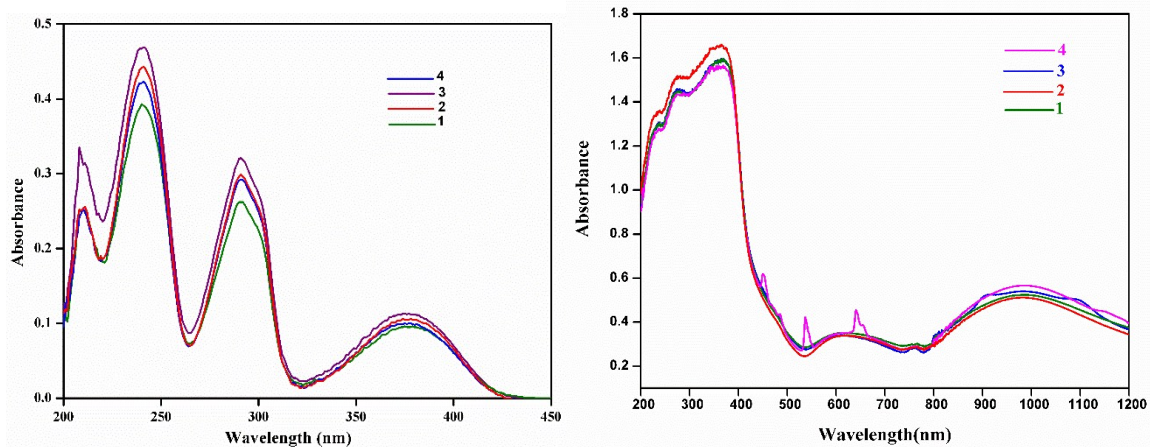

**Figure S2.** UV-Vis spectra of complexes 1-4 in solution (left) and in solid state (right)

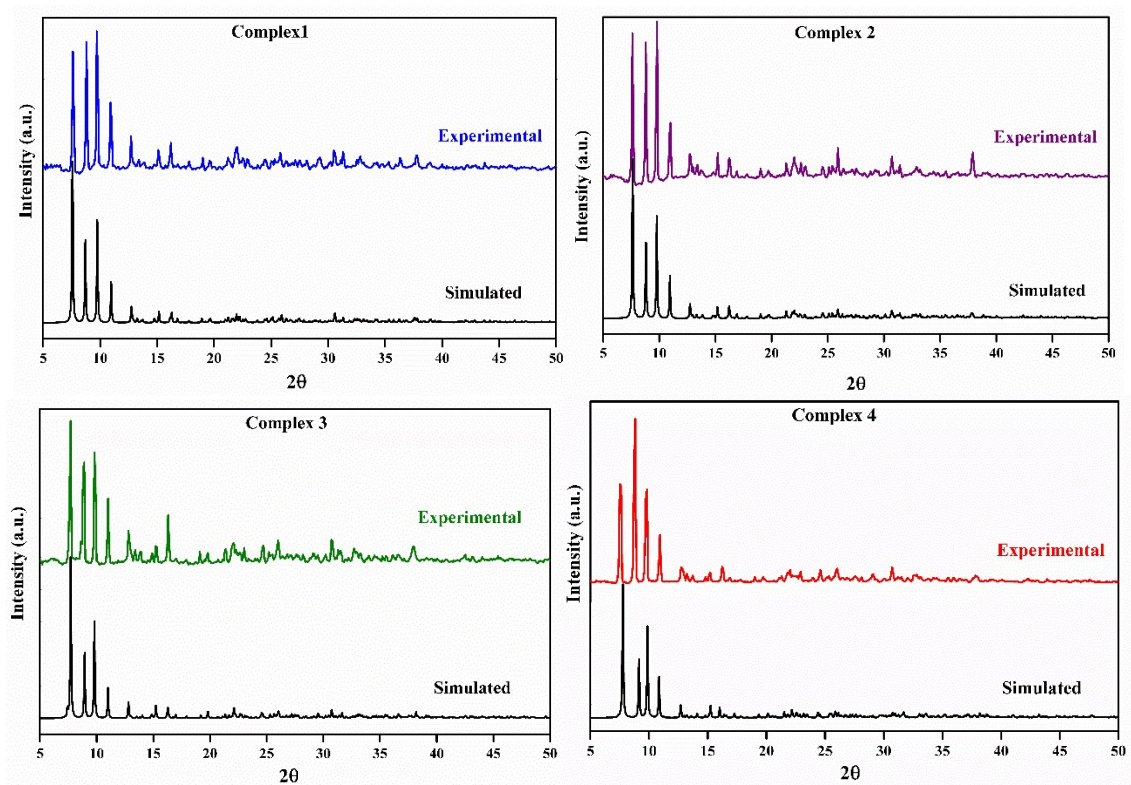

**Figure S3.** Simulated and experimental powder XRD patterns of complexes 1-4

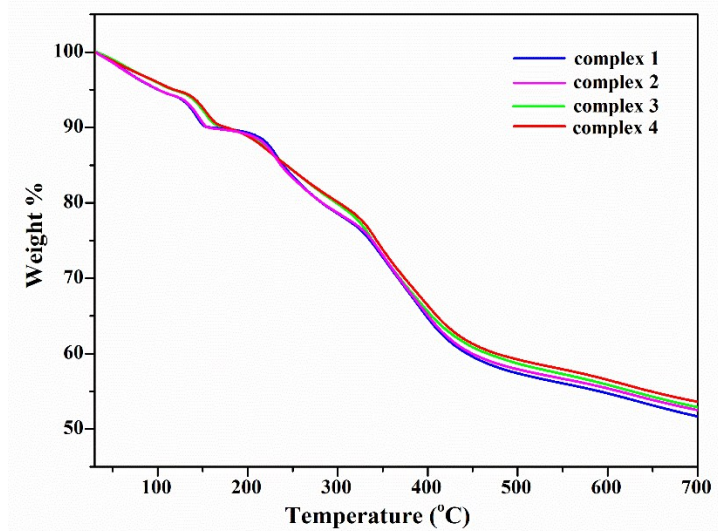

**Figure S4.** Thermogravimetric (TG) analysis of complexes 1-4. The % of weight loss in 40-125 °C is 5.8, 4.4, 5.3, 5.4 for complexes 1-4 respectively.

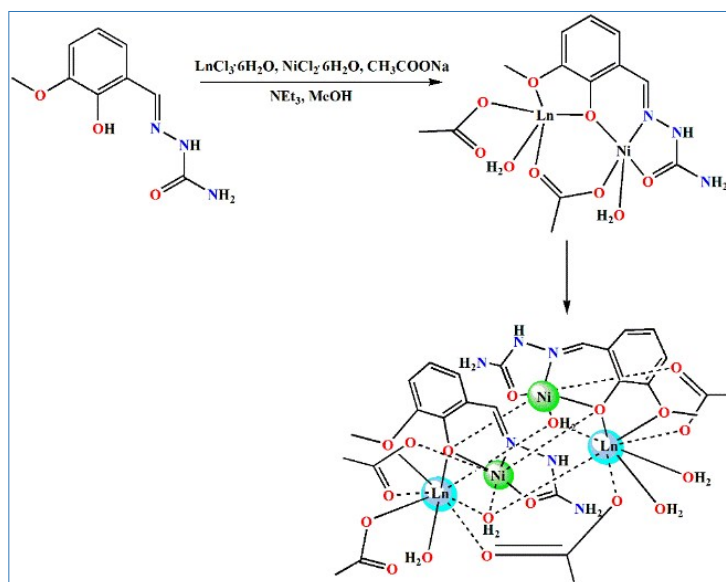

**Scheme S1** Most probable aggregation route

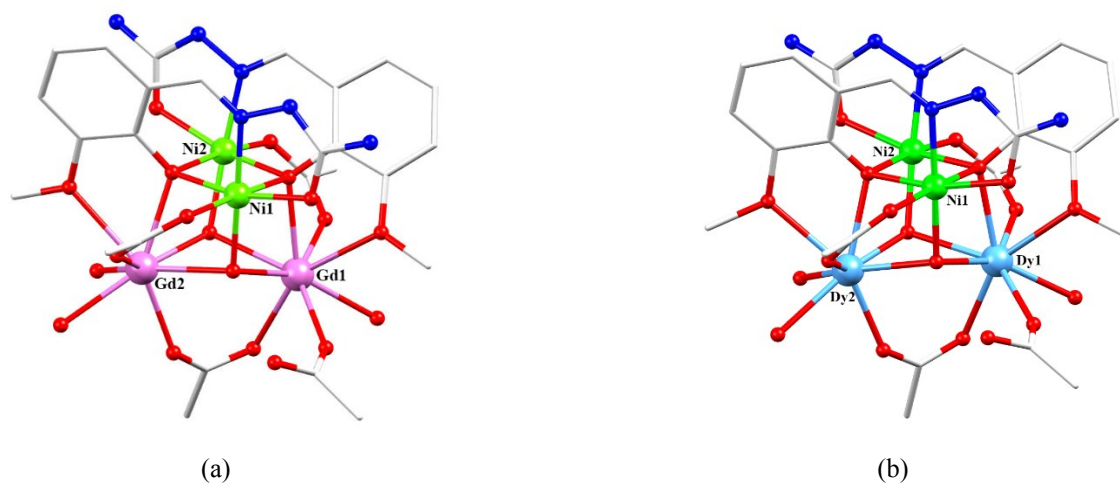

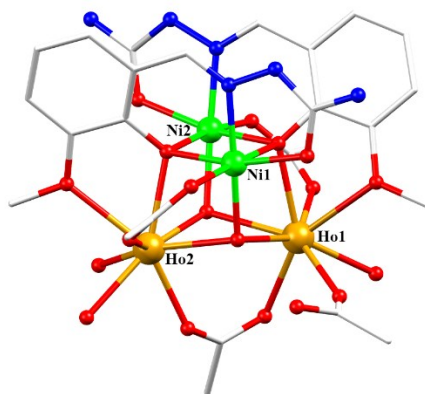

(c)

**Figure S5.** Molecular structure of complex 1(a), 3(b) and 4(c)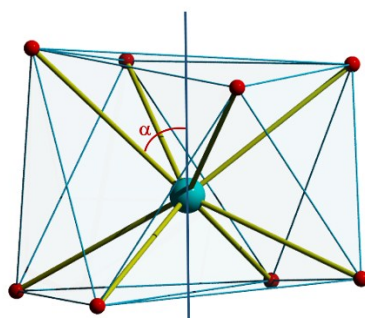**Figure S6.** The angle  $\alpha$ , half of the angle between the opposite ligands within a hemisphere**Table S1.** Selected bond lengths (Å) and bond angles (°) for complexes 1-4

| Bond lengths (Å) |          |          |           |          |
|------------------|----------|----------|-----------|----------|
|                  | 1 (Gd)   | 2 (Tb)   | 3 (Dy)    | 4 (Ho)   |
| Ln1–O2           | 2.465(6) | 2.474(5) | 2.419(8)  | 2.442(3) |
| Ln1–O3           | 2.361(7) | 2.341(6) | 2.312(8)  | 2.330(4) |
| Ln1–O4           | 2.394(7) | 2.411(7) | 2.374(9)  | 2.428(4) |
| Ln1–O5           | 2.530(9) | 2.556(7) | 2.520(10) | 2.561(4) |
| Ln1–O7           | 2.337(7) | 2.340(6) | 2.318(9)  | 2.337(4) |
| Ln1–O11          | 2.371(9) | 2.367(7) | 2.331(9)  | 2.340(4) |
| Ln1–O13          | 2.342(8) | 2.317(6) | 2.309(8)  | 2.297(4) |
| Ln1–O17          | 2.410(7) | 2.405(7) | 2.393(9)  | 2.397(4) |
| Ni1–N1           | 1.997(9) | 2.017(7) | 1.996(10) | 2.022(5) |
| Ni1–O1           | 2.035(8) | 2.059(6) | 2.033(8)  | 2.065(4) |
| Ni1–O2           | 2.231(6) | 2.230(5) | 2.198(8)  | 2.250(3) |
| Ni1–O3           | 2.003(7) | 2.012(6) | 1.989(8)  | 2.022(3) |
| Ni1–O10          | 2.048(7) | 2.050(6) | 2.037(9)  | 2.060(4) |



|         |           |           |           |          |
|---------|-----------|-----------|-----------|----------|
| Ni1–O15 | 2.067(9)  | 2.072(7)  | 2.058(9)  | 2.068(4) |
| Ln2–O1  | 2.467(8)  | 2.486(6)  | 2.453(8)  | 2.442(4) |
| Ln2–O3  | 2.357(8)  | 2.366(6)  | 2.317(9)  | 2.346(4) |
| Ln2–O4  | 2.388(7)  | 2.384(7)  | 2.330(11) | 2.342(4) |
| Ln2–O6  | 2.595(11) | 2.620(9)  | 2.554(12) | 2.561(5) |
| Ln2–O9  | 2.332(9)  | 2.320(8)  | 2.291(11) | 2.317(4) |
| Ln2–O12 | 2.344(9)  | 2.351(8)  | 2.293(10) | 2.314(4) |
| Ln2–O18 | 2.389(11) | 2.392(9)  | 2.376(12) | 2.372(4) |
| Ln2–O19 | 2.436(11) | 2.437(10) | 2.415(14) | 2.437(5) |
| Ni2–N4  | 1.998(10) | 2.024(7)  | 1.978(11) | 2.032(5) |
| Ni2–O1  | 2.237(7)  | 2.227(6)  | 2.203(8)  | 2.228(4) |
| Ni2–O2  | 2.030(7)  | 2.050(6)  | 2.016(8)  | 2.069(3) |
| Ni2–O4  | 2.000(8)  | 2.011(6)  | 1.984(9)  | 2.020(4) |
| Ni2–O8  | 2.064(7)  | 2.059(6)  | 2.074(9)  | 2.083(4) |
| Ni2–O16 | 2.083(8)  | 2.089(7)  | 2.072(9)  | 2.107(4) |
| Ln1–Ln2 | 3.786     | 3.779     | 3.737     | 3.772    |
| Ln1–Ni1 | 3.541     | 3.538     | 3.475     | 3.492    |
| Ln1–Ni2 | 3.423     | 3.440     | 3.390     | 3.443    |
| Ln2–Ni1 | 3.384     | 3.396     | 3.355     | 3.377    |
| Ln2–Ni2 | 3.593     | 3.598     | 3.544     | 3.567    |
| Ni1–Ni2 | 3.209     | 3.225     | 3.181     | 3.255    |

| Bond angles (°) |          |          |          |            |
|-----------------|----------|----------|----------|------------|
|                 | (1) Gd   | (2) Tb   | (3) Dy   | (4) Ho     |
| Ni1–O1–Ni2      | 97.3(3)  | 97.5(2)  | 97.3(3)  | 98.54(15)  |
| Ni1–O1–Ln2      | 97.0(3)  | 96.2(2)  | 96.4(3)  | 96.71(14)  |
| Ni2–O1–Ln2      | 99.5(3)  | 99.3(2)  | 99.0(3)  | 99.49(13)  |
| Ni1–O2–Ni2      | 97.6(3)  | 97.7(2)  | 98.0(3)  | 97.72(14)  |
| Ni1–O2–Ln1      | 97.8(2)  | 97.4(2)  | 97.6(3)  | 96.94(13)  |
| Ni2–O2–Ln1      | 98.8(3)  | 98.6(2)  | 99.3(3)  | 99.15(13)  |
| Ni1–O3–Ln1      | 108.2(3) | 108.5(2) | 107.6(3) | 107.55(15) |
| Ni1–O3–Ln2      | 101.5(3) | 101.4(2) | 102.1(3) | 100.99(15) |
| Ln1–O3–Ln2      | 106.7(3) | 106.8(2) | 107.7(3) | 107.55(13) |
| Ni2–O4–Ln1      | 102.0(3) | 101.8(3) | 101.8(4) | 101.06(15) |
| Ni2–O4–Ln2      | 109.6(3) | 109.6(3) | 110.2(4) | 109.50(16) |
| Ln1–O4–Ln2      | 104.7(3) | 104.0(2) | 105.2(3) | 104.51(13) |

**Table S2.** Continuous Shape Measures Analysis for all Lanthanide ions. List of reference shapes and abbreviations. Bold is for the lowest value for each metal center

| *Structure [ML <sub>8</sub> ] | OP-8   | HPY-8  | HBPY-8 | CU-8   | SAPR-8       | TDD-8        | JGBF-8 | JETBPY-8 | JBTPR-8 | BTPR-8 | JSD-8 | TT-8   | ETBPY-8 |
|-------------------------------|--------|--------|--------|--------|--------------|--------------|--------|----------|---------|--------|-------|--------|---------|
| Complex1 Gd1                  | 31.475 | 23.355 | 16.134 | 10.479 | 2.415        | <b>0.623</b> | 13.801 | 30.013   | 2.602   | 2.114  | 2.976 | 11.321 | 25.679  |
| Complex1 Gd2                  | 28.023 | 23.070 | 17.265 | 11.103 | <b>0.737</b> | 2.332        | 15.010 | 26.736   | 2.333   | 1.353  | 4.668 | 11.912 | 22.003  |
| Complex2 Tb1                  | 31.453 | 23.160 | 16.067 | 10.516 | 2.397        | <b>0.650</b> | 13.751 | 30.007   | 2.569   | 2.069  | 3.023 | 11.334 | 25.670  |
| Complex2 Tb2                  | 28.486 | 22.433 | 16.776 | 10.762 | <b>0.755</b> | 2.424        | 14.914 | 26.370   | 2.421   | 1.533  | 4.761 | 11.549 | 21.720  |
| Complex3 Dy1                  | 31.261 | 23.125 | 16.187 | 10.533 | 2.267        | <b>0.674</b> | 13.539 | 30.020   | 2.482   | 1.972  | 3.017 | 11.381 | 25.184  |
| Complex3 Dy2                  | 28.520 | 22.506 | 17.349 | 11.097 | <b>0.684</b> | 2.450        | 15.393 | 26.144   | 2.632   | 1.765  | 4.915 | 11.857 | 21.490  |
| Complex4 Ho1                  | 31.882 | 22.617 | 16.343 | 10.549 | 2.246        | <b>0.722</b> | 13.429 | 29.941   | 2.362   | 1.899  | 3.151 | 11.347 | 25.410  |
| Complex4 Ho2                  | 29.132 | 22.137 | 16.492 | 10.483 | <b>0.698</b> | 2.437        | 14.865 | 26.490   | 2.492   | 1.781  | 4.792 | 11.283 | 21.639  |

|          |                 |                                            |
|----------|-----------------|--------------------------------------------|
| *OP-8    | D <sub>8h</sub> | Octagon                                    |
| HPY-8    | C <sub>7v</sub> | Heptagonal pyramid                         |
| HBPY-8   | D <sub>6h</sub> | Hexagonal bipyramid                        |
| CU-8     | O <sub>h</sub>  | Cube                                       |
| SAPR-8   | D <sub>4d</sub> | Square antiprism                           |
| TDD-8    | D <sub>2d</sub> | Triangular dodecahedron                    |
| JGBF-8   | D <sub>2d</sub> | Johnson gyrobifastigium J26                |
| JETBPY-8 | D <sub>3h</sub> | Johnson elongated triangular bipyramid J14 |
| JBTPR-8  | C <sub>2v</sub> | Biaugmented trigonal prism J50             |
| BTPR-8   | C <sub>2v</sub> | Biaugmented trigonal prism                 |
| JSD-8    | D <sub>2d</sub> | Snub diphenoid J84                         |
| TT-8     | T <sub>d</sub>  | Triakis tetrahedron                        |
| ETBPY-8  | D <sub>3h</sub> | Elongated trigonal bipyramid               |

**Table S3.** The overview of the structural and magnetic parameters for some Ni<sub>2</sub>-Ln<sub>2</sub> cube complexes

| CSD code | <i>J</i> values (cm <sup>-1</sup> )                                                        | Angles                                                   | Remarks                                                                           | Reference No. |
|----------|--------------------------------------------------------------------------------------------|----------------------------------------------------------|-----------------------------------------------------------------------------------|---------------|
| OTEXUH   | <i>J</i> (Ni-Ni) = -3.638<br><i>J</i> (Ni-Gd) = 0.919<br><i>J</i> (Gd-Gd) = assumed as '0' | <Ni-O-Ni = 99.72°, 98.44°<br><Gd-O-Gd = 108.77°, 109.36° | Ni <sub>2</sub> Dy <sub>2</sub> complex displays slow relaxation of magnetization | 52            |
| WAMXIT   | <i>J</i> (Ni-Ni) = +3.28<br><i>J</i> (Ni-Gd) = +0.46<br><i>J</i> (Gd-Gd) = -0.19           | <Ni-O-Ni = 96.65°, 98.56°<br><Gd-O-Gd = 102.66°, 104.27° | The Ni <sub>2</sub> Dy <sub>2</sub> complex does not behave as a SMM              | 57            |
| REWXIC   | <i>J</i> (Ni-Ni) = +3.30<br><i>J</i> (Ni-Gd) = +0.26<br><i>J</i> (Gd-Gd) = -0.11           | <Ni-O-Ni = 98.06°<br><Gd-O-Gd = 109.62°                  | Out-of-phase signals in ac susceptibilities above 1.9 K was not observed          | 58            |

|           |                                                                                       |                                                                                                                                        |                                                     |           |
|-----------|---------------------------------------------------------------------------------------|----------------------------------------------------------------------------------------------------------------------------------------|-----------------------------------------------------|-----------|
| DIJFOU    | $J(\text{Ni-Ni}) = +5.20$<br>$J(\text{Ni-Gd}) = +0.86$<br>$J(\text{Gd-Gd}) = -0.0034$ | $\langle \text{Ni-O-Ni} \rangle =$<br>$98.63^\circ, 98.13^\circ$<br>$\langle \text{Gd-O-Gd} \rangle =$<br>$108.14^\circ, 109.04^\circ$ | $\text{Ni}_4\text{Dy}_4$ Complex is<br>not SMM      | 59        |
| Complex-1 | $J(\text{Ni-Ni}) = -0.91$<br>$J(\text{Ni-Gd}) = +0.02$<br>$J(\text{Gd-Gd}) = +0.14$   | $\langle \text{Ni-O-Ni} \rangle =$<br>$97.46^\circ, 97.67^\circ$<br>$\langle \text{Gd-O-Gd} \rangle =$<br>$104.48^\circ, 106.91^\circ$ | Out-of-phase ac<br>susceptibility signals<br>absent | This work |
